# Supplementary material for: Effects of CD36 Genotype on Oral Perception of Oleic Acid Supplemented Safflower Oil Emulsions in Two Ethnic Groups: A Preliminary Study
Source: PubMed Central journal article supplement (PMC5969292; doi:10.1111/1750-3841.14115), 2018-04-16
Supplement: JFDS-83-1373-s001.pdf [file JFDS-83-1373-s001.pdf]

## East Asians

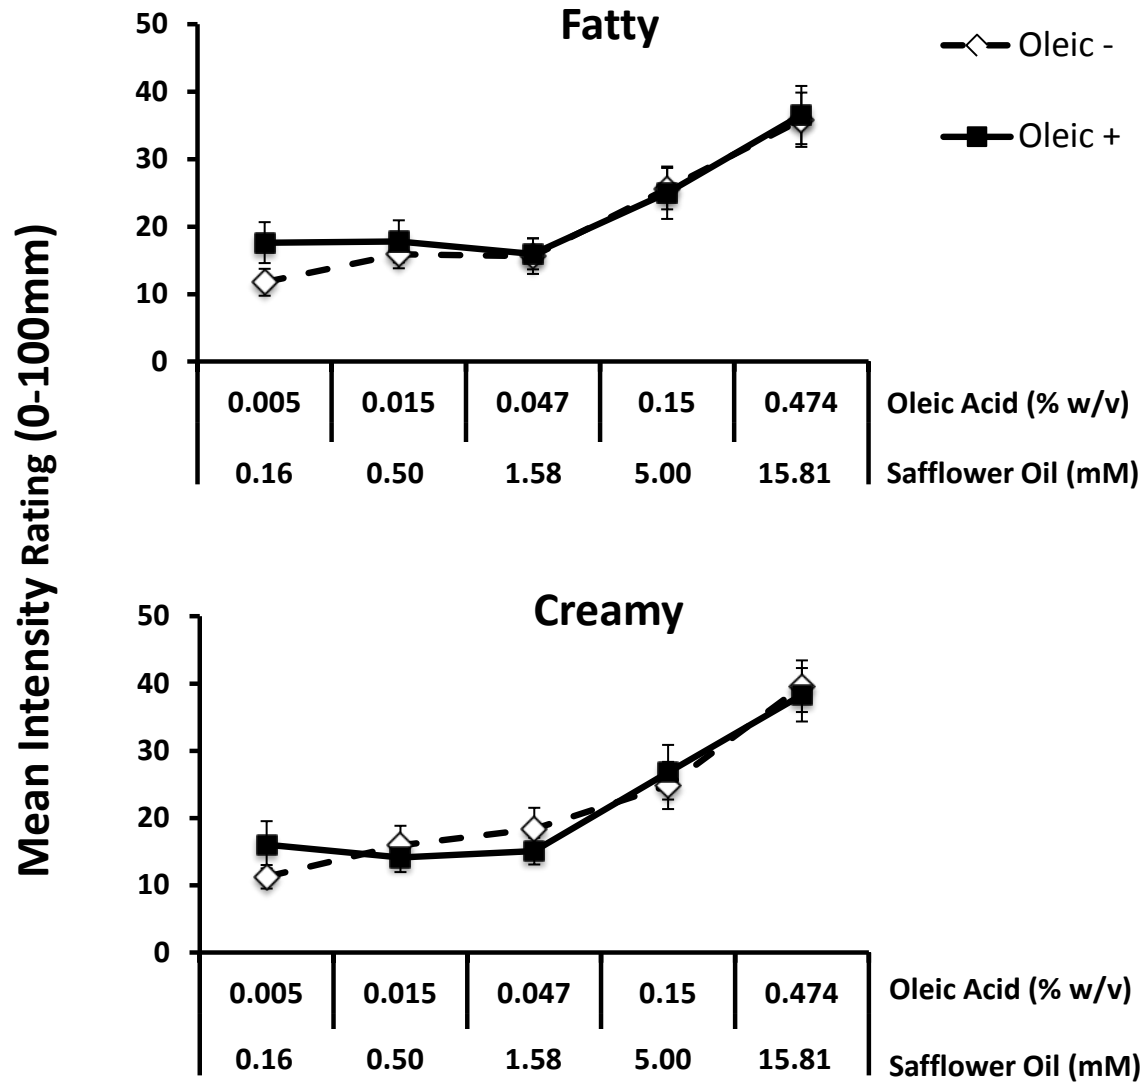

**Supplemental Figure 1:** Perceived intensity of fatty and creamy attributes in safflower oil emulsions with or without added oleic acid in EAST ASIANS. Oleic acid supplementation did not enhance the perception of these attributes across concentrations

## Caucasians

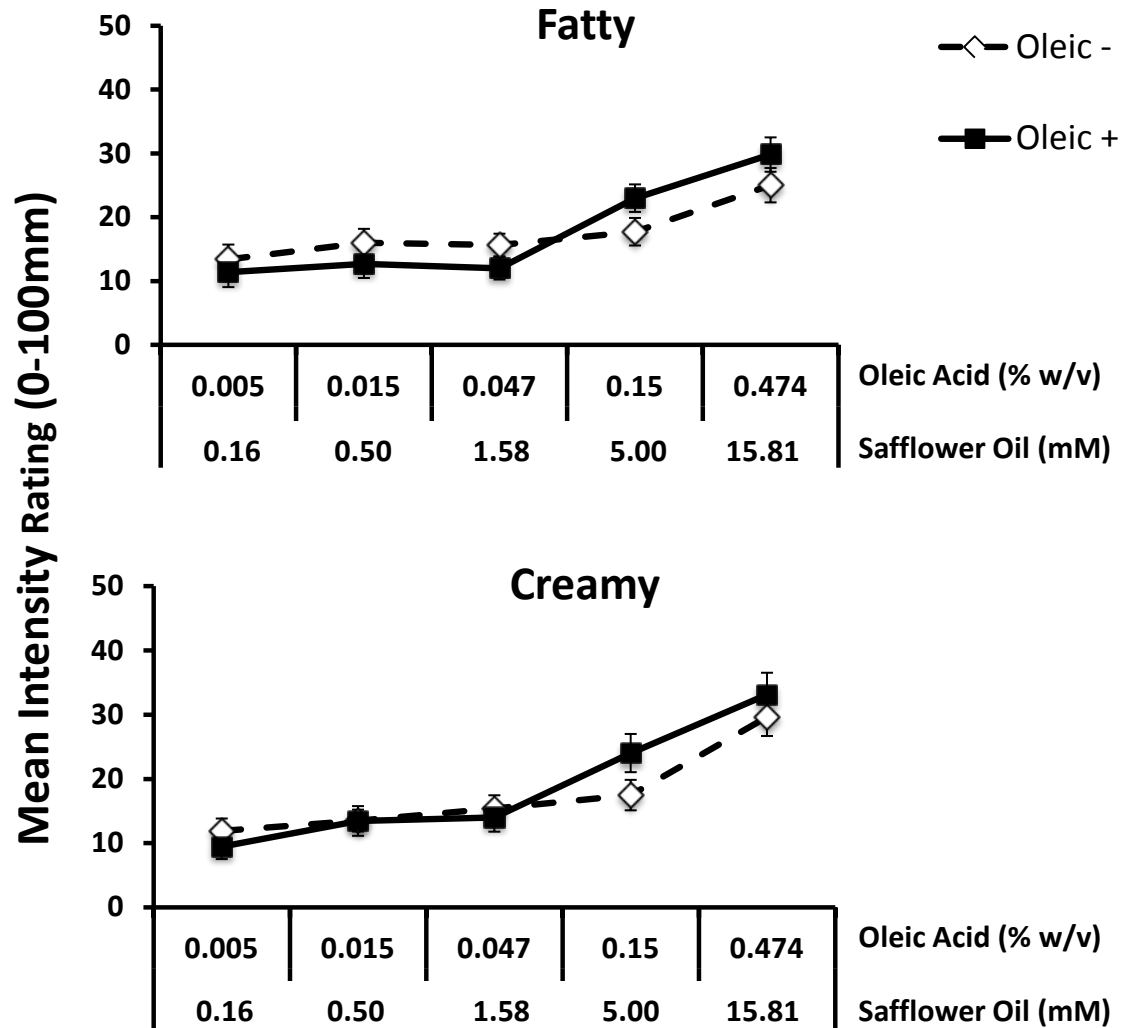

**Supplemental Figure 2:** Perceived intensity of fatty and creamy attributes in safflower oil emulsions with or without added oleic acid in **CAUCASIANS**. Oleic acid supplementation did not enhance the perception of these attributes across concentrations.
